# Supplementary material
Source: MDPI journal article supplement (https://www.mdpi.com/2409-515X/10/1/15)
Supplement: s1 [file s1]

C14:1/C18:1

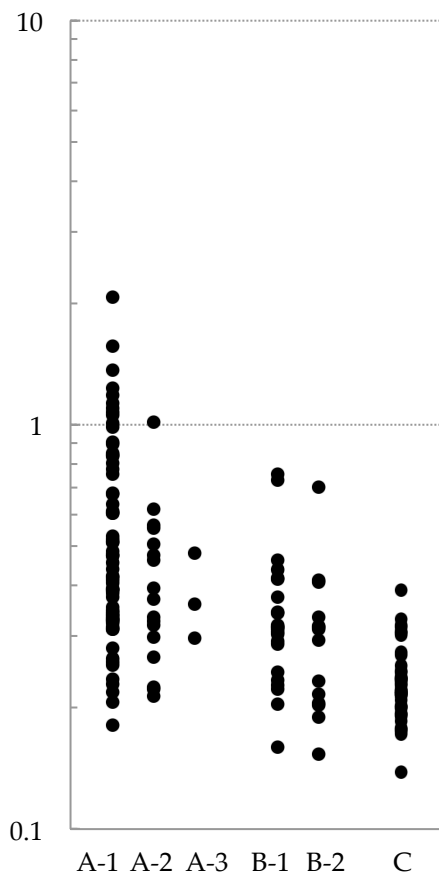

C14:1/C18

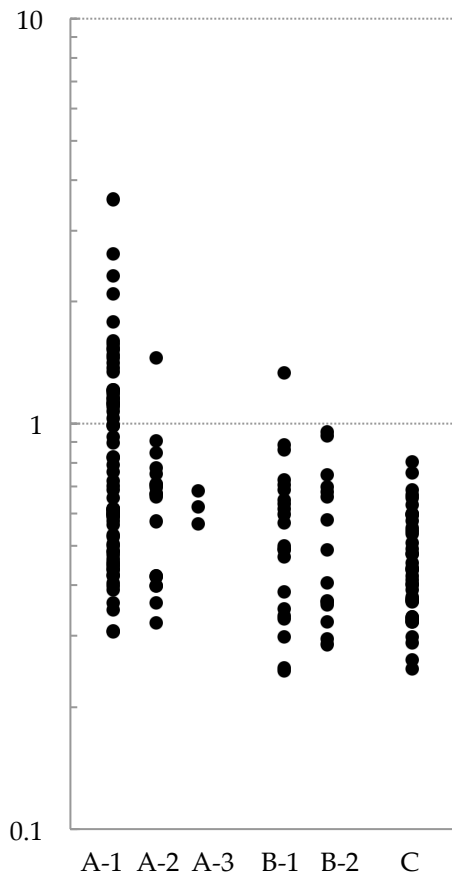

C14:1/C16

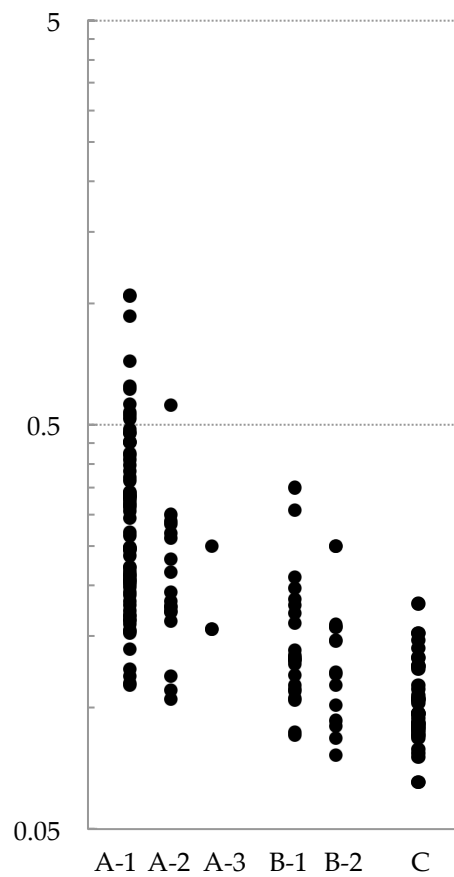

C14:1/C16-OH

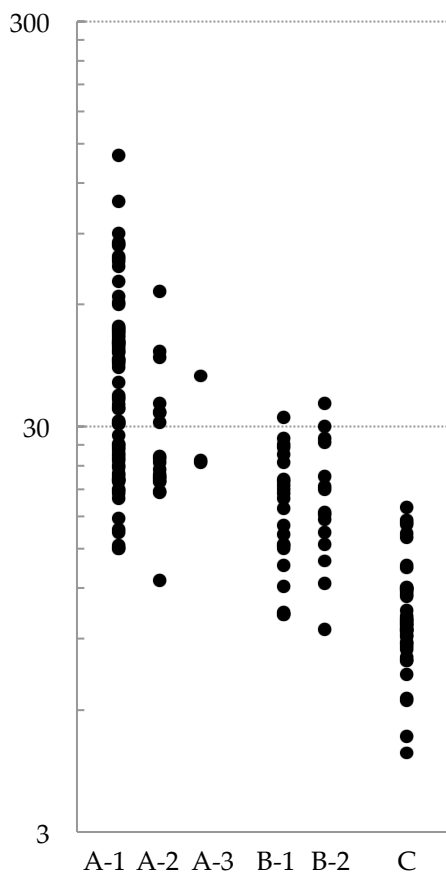

C14:1/C14

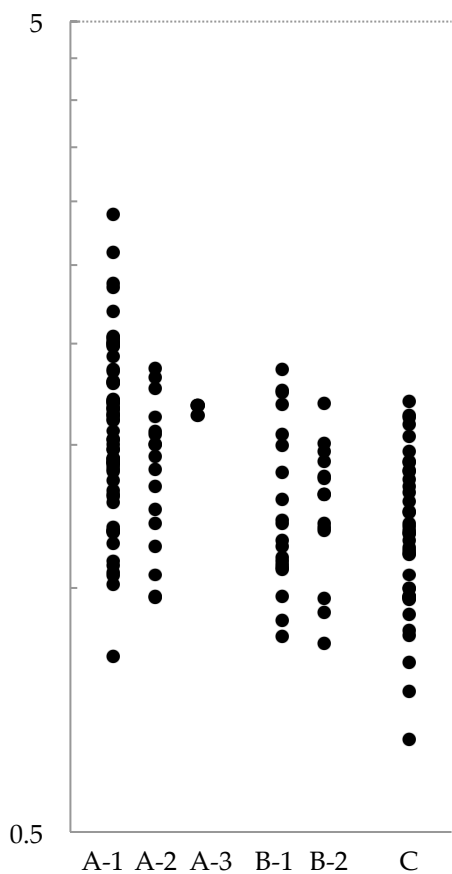

C14:1/C12

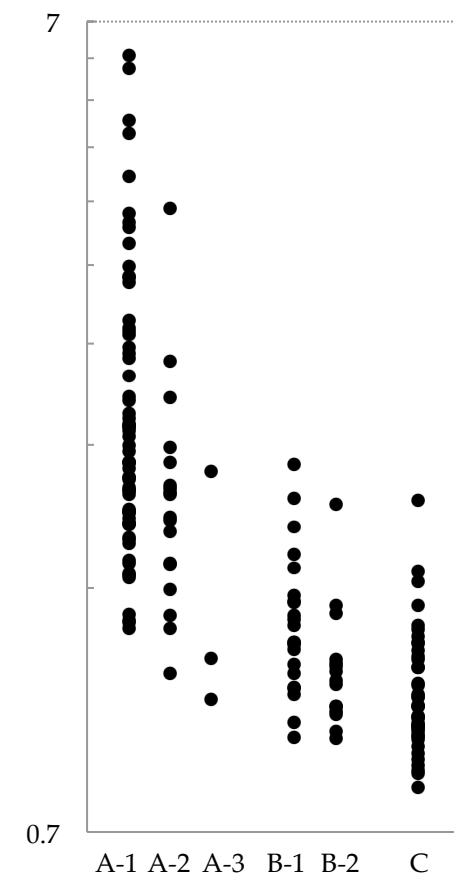

C14:1/C10

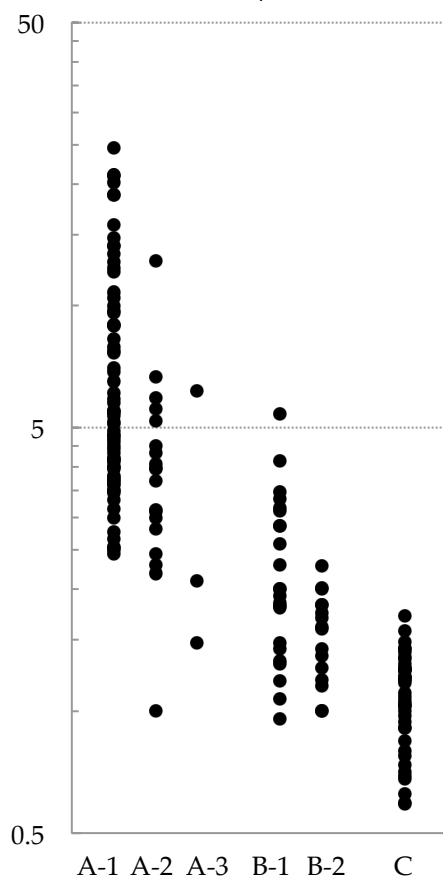

C14:1/C8

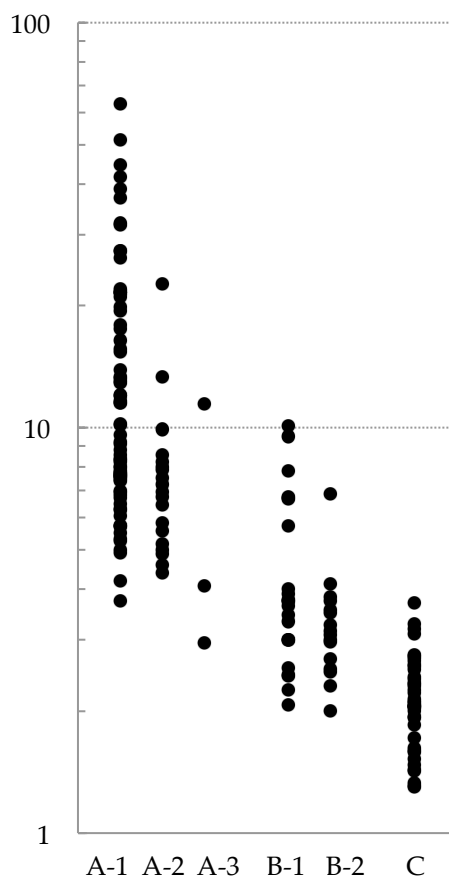

C14:1/C6

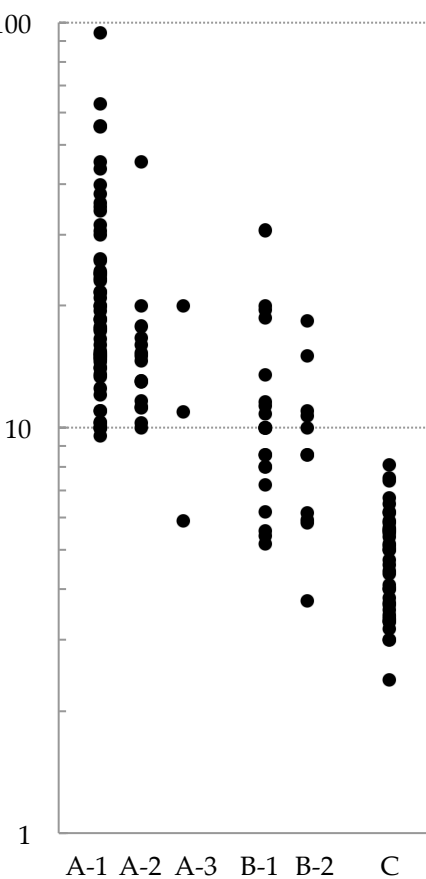

C14:1/C4

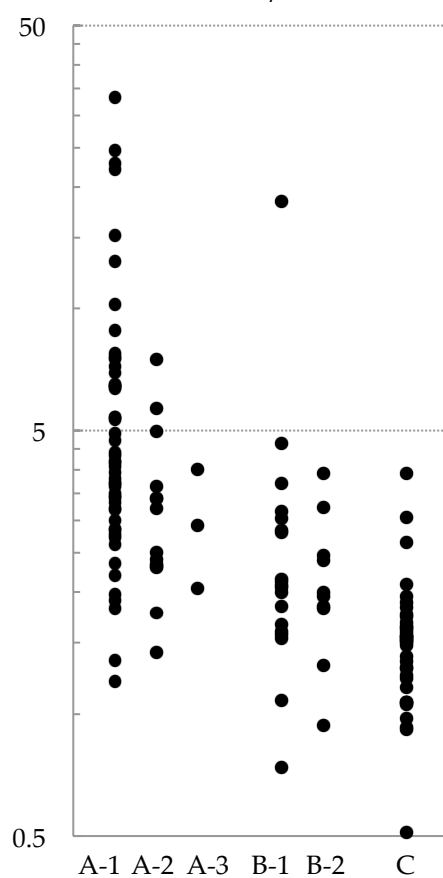

C14:1/C3

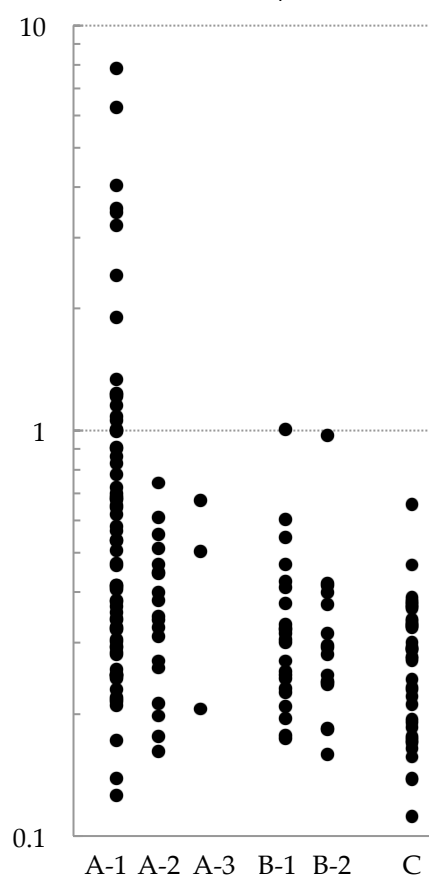

C14:1/C2 \*

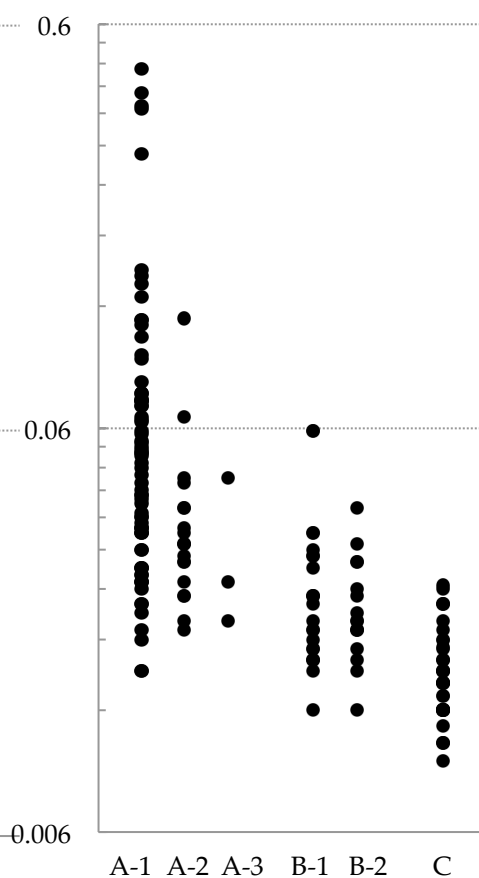

C14:1/C0

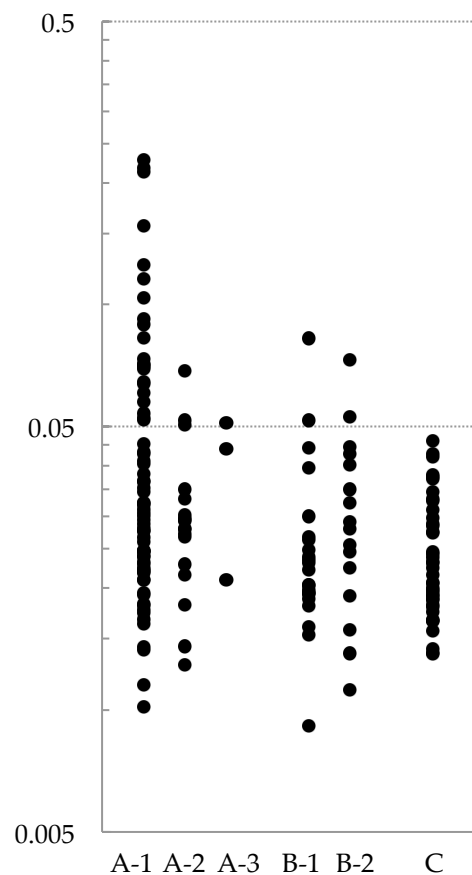

**Figure S2.** Ratios of C14:1 to various acylcarnitines and free carnitine in dried blood specimens of newborns. Infants with biallelic *ACADVL* variants and a VLCAD activity of <20% (A-1), 20%–40% (A-2), and >40% (A-3); infants heterozygous for *ACADVL* variants with a VLCAD activity of 20%–40% (B-1) and >40% (B-2); infants with a VLCAD activity of >70% without confirmation by *ACADVL* sequencing (C)

C0, free carnitine

\* The graph of the C14:1/C2 ratio is also shown in Figure 1b.
