# Supplementary material
Source: MDPI journal article supplement (https://www.mdpi.com/2409-515X/10/1/15)
Supplement: s1 [file s1]

**Table S1.** Results of newborn screening and confirmatory tests of the infants enrolled in the present study and the diagnostic data of symptomatic patients acquired after the clinical onset used as reference.

| Case ID              | Current NBS Indices and Cutoff<br>(Mean ± SD in 35 Laboratories) |                           | Serum C14:1<br>(nmol/mL) | VLCAD<br>Activity<br>(%) <sup>1</sup> | ACADVL Genotype <sup>2</sup> |               |                       |                | Diagnoses of<br>NBS-Positive<br>Infants |
|----------------------|------------------------------------------------------------------|---------------------------|--------------------------|---------------------------------------|------------------------------|---------------|-----------------------|----------------|-----------------------------------------|
|                      | C14:1 (nmol/mL)<br>0.34 ± 0.06                                   | C14:1/C2<br>0.013 ± 0.004 |                          |                                       | Variant 1                    |               | Variant 2             |                |                                         |
|                      |                                                                  |                           |                          |                                       | cDNA                         | Amino<br>acid | cDNA                  | Amino<br>acid  |                                         |
| NBS-positive infants |                                                                  |                           |                          |                                       |                              |               |                       |                |                                         |
| N-01                 | 3.38                                                             | 0.285                     | 9.67                     | 0.36                                  | 878+1G > C                   |               | 919A > G              | T307A          | Patient                                 |
| N-02                 | 1.26                                                             | 0.137                     | 3.76                     | 2.26                                  | 865G > A                     | G289R         | 1820G>C               | C607S          | Patient                                 |
| N-03                 | 4.29                                                             | 0.376                     | 15.93                    | 2.32                                  | 996dupT                      | A333Cfs       | 1358G > A             | R453Q          | Patient                                 |
| N-04                 | 0.78                                                             | 0.063                     | 0.90                     | 2.87                                  | 790A > G                     | K264E         | 996dupT               | A333Cfs        | Patient                                 |
| N-05                 | 5.65                                                             | 0.405                     | 8.66                     | 3.04                                  | 996dupT                      | A333Cfs       | 1793A > G             | H598R          | Patient                                 |
| N-06                 | 0.96                                                             | 0.044                     | 0.98                     | 3.41                                  | 1246G > A                    | A416T         | 1246G > A             | A416T          | Patient                                 |
| N-07                 | 0.65                                                             | 0.049                     | ND                       | 3.45                                  | 623-3C > A                   |               | 865G > A              | G289R          | Patient                                 |
| N-08                 | 0.42                                                             | 0.022                     | 0.50                     | 4.15                                  | 1793A > G                    | H598R         | 1808G > C             | C603S          | Patient                                 |
| N-09                 | 2.80                                                             | 0.464                     | 4.08                     | 4.40                                  | 1349G > A                    | R450H         | 1349G > A             | R450H          | Patient                                 |
| N-10                 | 2.23                                                             | 0.089                     | 1.11                     | 4.50                                  | 996dupT                      | A333Cfs       | 1246G > A             | A416T          | Patient                                 |
| N-11                 | 2.73                                                             | 0.143                     | 0.94                     | 4.62                                  | 787G > A                     | A263T         | 1427G > A             | G476D          | Patient                                 |
| N-12                 | 0.40                                                             | 0.033                     | 0.27                     | 4.84                                  | 334T > C                     | F112L         | 520G > A<br>1434G > A | V174M<br>M478I | Patient                                 |
| N-13                 | 0.40                                                             | 0.024                     | 2.75                     | 4.87                                  | 790A > G                     | K264E         | 1349G > A             | R450H          | Patient                                 |
| N-14                 | 4.79                                                             | 0.148                     | 0.99                     | 5.14                                  | 708_709delCT                 | C237Wfs       | 1246G > A             | A416T          | Patient                                 |
| N-15                 | 0.61                                                             | 0.051                     | 1.84                     | 5.38                                  | 538G > A                     | A180T         | 1002G > A             | M334I          | Patient                                 |
| N-16                 | 0.90                                                             | 0.070                     | 1.49                     | 5.93                                  | 1077G > A                    | A359=         | 1077G > A             | A359=          | Patient                                 |
| N-17                 | 0.46                                                             | 0.041                     | 1.17                     | 5.94                                  | 538G > A                     | A180T         | 1246G > A             | A416T          | Patient                                 |
| N-18                 | 2.21                                                             | 0.111                     | 2.36                     | 6.38                                  | 865G > A                     | G289R         | 1732_1734delATG       | M578del        | Patient                                 |
| N-19                 | 0.42                                                             | 0.022                     | 0.65                     | 6.56                                  | 746G > T                     | W249L         | 1349G > A             | R450H          | Patient                                 |
| N-20                 | 1.08                                                             | 0.108                     | 1.93                     | 6.59                                  | 1246G > A                    | A416T         | 1246G > A             | A416T          | Patient                                 |
| N-21                 | 1.17                                                             | 0.073                     | 1.15                     | 6.61                                  | 1246G > A                    | A416T         | 1793A > G             | H598R          | Patient                                 |
| N-22                 | 0.31                                                             | 0.073                     | 0.91                     | 6.63                                  | 890AGA[2]                    | K299del       | 1820G > C             | C607S          | Patient                                 |
| N-23                 | 0.68                                                             | 0.026                     | 0.54                     | 6.75                                  | 852G > A                     | V284=         | 1434G > A             | M478I          | Patient                                 |
| N-24                 | 1.37                                                             | 0.070                     | 0.34                     | 6.91                                  | 538G > A                     | A180T         | 790A > G              | K264E          | Patient                                 |
| N-25                 | 0.33                                                             | 0.030                     | 0.49                     | 7.15                                  | 709T > C                     | C237R         | 709T > C              | C237R          | Patient                                 |
| N-26                 | 1.16                                                             | 0.056                     | 0.61                     | 7.20                                  | 790A > G                     | K264E         | 996dupT               | A333Cfs        | Patient                                 |
| N-27                 | 0.37                                                             | 0.025                     | 0.45                     | 7.42                                  | 548G > A                     | S183N         | 779C > T              | T260M          | Patient                                 |
| N-28                 | 1.31                                                             | 0.127                     | 2.66                     | 7.71                                  | 553G > A                     | G185S         | 709T > C              | C237R          | Patient                                 |
| N-29                 | 0.61                                                             | 0.054                     | 0.92                     | 8.01                                  | 266 C > A                    | P89Q          | 865 G > A             | G289R          | Patient                                 |
| N-30                 | 0.95                                                             | 0.070                     | 1.33                     | 8.10                                  | 1246G > A                    | A416T         | 1532G > A             | R511Q          | Patient                                 |
| N-31                 | 0.97                                                             | 0.059                     | 1.99                     | 8.63                                  | 1246G > A                    | A416T         | 1349G > A             | R450H          | Patient                                 |
| N-32                 | 1.08                                                             | 0.062                     | 0.72                     | 8.72                                  | 334T > C                     | F112L         | 503G > A              | G168D          | Patient                                 |
| N-33                 | 0.46                                                             | 0.055                     | 4.17                     | 8.73                                  | 370delG                      | A124Lfs       | 709T > C              | C237R          | Patient                                 |
| N-34                 | 1.37                                                             | 0.036                     | 0.38                     | 8.87                                  | 1246G > A                    | A416T         | 1820G > C             | C607S          | Patient                                 |
| N-35                 | 0.52                                                             | 0.037                     | 0.30                     | 8.98                                  | 637G > A                     | A213T         | 1820G > C             | C607S          | Patient                                 |
| N-36                 | 0.48                                                             | 0.034                     | 0.50                     | 9.19                                  | 652G > A                     | E218K         | 865G > A              | G289R          | Patient                                 |
| N-37                 | 0.57                                                             | 0.030                     | 0.18                     | 9.36                                  | 1246G > A                    | A416T         | 1434G > A             | M478I          | Patient                                 |
| N-38                 | 1.03                                                             | 0.068                     | 0.73                     | 9.75                                  | 553G > A                     | G185S         | 1820G > C             | C607S          | Patient                                 |
| N-39                 | 0.67                                                             | 0.041                     | 0.42                     | 9.87                                  | 727C > T                     | L243F         | 1820G > C             | C607S          | Patient                                 |
| N-40                 | 1.24                                                             | 0.101                     | 1.06                     | 10.46                                 | 842C > G                     | A281G         | 1246G > A             | A416T          | Patient                                 |
| N-41                 | 0.25                                                             | 0.034                     | 0.39                     | 10.46                                 | 307A > G                     | K103E         | 854A > G              | E285G          | Patient                                 |
| N-42                 | 0.40                                                             | 0.015                     | 0.51                     | 11.04                                 | 996dupT                      | A333Cfs       | 1434G > A             | M478I          | Patient                                 |
| N-43                 | 0.44                                                             | 0.078                     | 0.50                     | 11.56                                 | 614T > G                     | L205R         | 1820G > C             | C607S          | Patient                                 |
| N-44                 | 0.48                                                             | 0.035                     | 1.23                     | 11.60                                 | 709T > C                     | C237R         | 1246G > A             | A416T          | Patient                                 |
| N-45                 | 4.57                                                             | 0.369                     | 3.42                     | 12.01                                 | 779C > T                     | T260M         | 996dupT               | A333Cfs        | Patient                                 |
| N-46                 | 0.27                                                             | 0.025                     | 0.54                     | 12.09                                 | 1357C > T                    | R453*         | 1434G > A             | M478I          | Patient                                 |
| N-47                 | 0.48                                                             | 0.042                     | 0.95                     | 12.31                                 | 1434G > A                    | M478I         | 1532G > A             | R511Q          | Patient                                 |
| N-48                 | 1.15                                                             | 0.053                     | ND                       | 12.65                                 | 1144A > C                    | K382Q         | 1820G > C             | C607S          | Patient                                 |
| N-49                 | 1.76                                                             | 0.091                     | 0.24                     | 12.78                                 | 709T > C                     | C237R         | 1532G > A             | R511Q          | Patient                                 |

|       |      |       |      |       |                                     |                  |                          |         |         |
|-------|------|-------|------|-------|-------------------------------------|------------------|--------------------------|---------|---------|
| N-50  | 0.46 | 0.021 | 0.25 | 13.47 | 548G > A                            | S183N            | 1246G > A                | A416T   | Patient |
| N-51  | 0.90 | 0.033 | ND   | 13.61 | 865G > A                            | G289R            | 1820G > C                | C607S   | Patient |
| N-52  | 0.46 | 0.033 | 1.09 | 13.63 | 1820G > C                           | C607S            | 1793A > G                | H598R   | Patient |
| N-53  | 0.41 | 0.027 | 0.27 | 13.65 | 745T > C                            | W249R            | 1820G > C                | C607S   | Patient |
| N-54  | 0.37 | 0.025 | 0.38 | 13.65 | 854A > G                            | E285G            | 1820G > C                | C607S   | Patient |
| N-55  | 1.05 | 0.064 | ND   | 13.85 | 1078-2A > G                         |                  | 1700G > A                | R567Q   | Patient |
| N-56  | 0.35 | 0.052 | 0.21 | 13.96 | 334T > C                            | F112L            | 1678+3_1678+6del<br>AAGT |         | Patient |
| N-57  | 0.74 | 0.052 | 0.59 | 13.98 | 1144A > C                           | K382Q            | 1434G > A                | M478I   | Patient |
| N-58  | 0.61 | 0.071 | 0.35 | 14.90 | 996dupT                             | A333Cfs          | 1820G > C                | C607S   | Patient |
| N-59  | 0.33 | 0.018 | 0.59 | 15.21 | 278-31_278-18del<br>GCCTGACCAGCCTG  |                  | 1434G > A                | M478I   | Patient |
| N-60  | 0.46 | 0.019 | 0.35 | 15.55 | 506T > C                            | M169T            | 609delC                  | K204Sfs | Patient |
| N-61  | 0.42 | 0.027 | 0.29 | 15.66 | 538G > A                            | A180T            | 1820G > C                | C607S   | Patient |
| N-62  | 1.59 | 0.058 | 0.28 | 16.93 | 1077G > A                           | A359=            | 1820G > C                | C607S   | Patient |
| N-63  | 0.53 | 0.046 | 0.36 | 17.02 | 996dupT                             | A333Cfs          | 1820G > C                | C607S   | Patient |
| N-64  | 0.42 | 0.039 | 0.48 | 17.17 | 709T > C                            | C237R            | 1246G > A                | A416T   | Patient |
| N-65  | 1.53 | 0.111 | 0.32 | 17.81 | 334T > C                            | F112L            | 334T > C                 | F112L   | Patient |
| N-66  | 1.51 | 0.068 | 1.17 | 17.91 | 1269G > A                           | S423=            | 1820G > C                | C607S   | Patient |
| N-67  | 0.31 | 0.034 | 0.56 | 18.15 | 1349G > A                           | R450H            | 1820G > C                | C607S   | Patient |
| N-68  | 1.00 | 0.048 | 0.47 | 18.70 | 507_527delGCATGACCT<br>TGGCGTGGGCAT | M169_<br>G175del | 1226C > T                | T409M   | Patient |
| N-69  | 0.30 | 0.026 | 0.48 | 18.93 | 709T > C                            | C237R            | 709T > C                 | C237R   | Patient |
| N-70  | 0.44 | 0.036 | 0.56 | 19.28 | 71_77delTCACGGC                     | L24Rfs           | 1434G > A                | M478I   | Patient |
| N-71  | 0.51 | 0.040 | 0.58 | 19.42 | 1246G > A                           | A416T            | 1434G > A                | M478I   | Patient |
| N-72  | 0.40 | 0.027 | 0.37 | 19.74 | 538G > A                            | A180T            | 1820G > C                | C607S   | Patient |
| N-73  | 0.40 | 0.015 | 0.56 | 19.88 | 538G > A                            | A180T            | 1820G > C                | C607S   | Patient |
| N-74  | 0.43 | 0.044 | 0.45 | 20.32 | 1358G > A                           | R453Q            | 1820G > C                | C607S   | Patient |
| N-75  | 1.81 | 0.112 | 2.86 | 21.00 | 779C > T                            | T260M            | 1246G > A                | A416T   | Patient |
| N-76  | 0.35 | 0.034 | 0.54 | 22.32 | 1349G > A                           | R450H            | 1820G > C                | C607S   | Patient |
| N-77  | 0.46 | 0.025 | 0.45 | 22.57 | 329C > T                            | S110F            | 1434G > A                | M478I   | Patient |
| N-78  | 0.30 | 0.023 | 0.16 | 22.66 | 865G > A                            | G289R            | 1246G > A                | A416T   | Patient |
| N-79  | 0.39 | 0.045 | 0.22 | 23.56 | 1144A > C                           | K382Q            | 1820G > C                | C607S   | Patient |
| N-80  | 0.41 | 0.019 | 0.22 | 23.70 | 277+1G > A                          |                  | 1226C > T                | T409M   | Patient |
| N-81  | 0.45 | 0.031 | 0.19 | 23.75 | 334T > C                            | F112L            | 1820G > C                | C607S   | Patient |
| N-82  | 0.40 | 0.029 | 0.52 | 24.76 | 854A > G                            | E285G            | 1820G > C                | C607S   | Patient |
| N-83  | 0.39 | 0.020 | 0.40 | 25.65 | 1246G > A                           | A416T            | 1820G > C                | C607S   | Patient |
| N-84  | 0.48 | 0.031 | 0.84 | 26.41 | 796C > G<br>1153C > T               | P266A<br>R385W   | 1820G > C                | C607S   | Patient |
| N-85  | 0.45 | 0.033 | ND   | 27.30 | 1434G > A                           | M478I            | 1820G > C                | C607S   | Patient |
| N-86  | 0.63 | 0.028 | 0.22 | 27.90 | 1246G > A                           | A416T            | 1820G > C                | C607S   | Patient |
| N-87  | 0.44 | 0.038 | 0.39 | 28.62 | 1226C > T                           | T409M            | 1748C > T                | S583L   | Patient |
| N-88  | 0.62 | 0.028 | 0.19 | 29.77 | 1434G > A                           | M478I            | 1820G > C                | C607S   | Patient |
| N-89  | 0.71 | 0.038 | 0.06 | 32.77 | 334T > C                            | F112L            | 1349G > A                | R450H   | Patient |
| N-90  | 0.89 | 0.064 | 0.38 | 35.60 | 1226C > T                           | T409M            | 1748C > T                | S583L   | Patient |
| N-91  | 0.66 | 0.031 | 0.29 | 35.81 | 996dupT                             | A333Cfs          | 1226C > T                | T409M   | Patient |
| N-92  | 0.56 | 0.023 | 0.30 | 38.70 | 1226C > T                           | T409M            | 1793A > G                | H598R   | Patient |
| N-93  | 0.42 | 0.025 | 0.25 | 40.55 | 1405C > T                           | R469W            | 1332+10G > A             |         | Patient |
| N-94  | 0.80 | 0.045 | 1.02 | 58.73 | 334T > C                            | F112L            | 1009C > T                | L337F   | Patient |
| N-95  | 0.47 | 0.020 | 0.13 | 62.00 | 746G > T                            | W249L            | 1592G > A                | R531Q   | Patient |
| N-96  | 0.41 | 0.020 | 0.27 | 21.62 | 1349G > A                           | R450H            | No variant               |         | Carrier |
| N-97  | 0.30 | 0.019 | 0.13 | 24.17 | 422C > A                            | A141D            | No variant               |         | Carrier |
| N-98  | 0.60 | 0.027 | ND   | 24.30 | 1097G > C                           | R366P            | No variant               |         | Carrier |
| N-99  | 0.59 | 0.017 | 0.21 | 25.41 | 305T > C                            | L102P            | No variant               |         | Carrier |
| N-100 | 0.24 | 0.017 | 0.20 | 26.35 | 1078-2A > G                         |                  | No variant               |         | Carrier |
| N-101 | 0.20 | 0.023 | ND   | 27.69 | 1820G > C                           | C607S            | No variant               |         | Carrier |
| N-102 | 0.40 | 0.023 | 0.28 | 27.92 | 842C > G                            | A281G            | No variant               |         | Carrier |
| N-103 | 0.36 | 0.012 | 0.25 | 28.20 | 996dupT                             | A333Cfs          | No variant               |         | Carrier |

|       |      |       |      |        |                   |              |            |         |
|-------|------|-------|------|--------|-------------------|--------------|------------|---------|
| N-104 | 0.48 | 0.029 | 0.26 | 28.67  | 722A > G          | Y241C        | No variant | Carrier |
| N-105 | 0.98 | 0.059 | ND   | 28.71  | 1226C > T         | T409M        | No variant | Carrier |
| N-106 | 1.28 | 0.059 | ND   | 31.68  | 1096C > T         | R366C        | No variant | Carrier |
| N-107 | 0.39 | 0.016 | 0.25 | 32.76  | 1078-2A > G       |              | No variant | Carrier |
| N-108 | 0.43 | 0.023 | 0.16 | 33.33  | 538G > A          | A180T        | No variant | Carrier |
| N-109 | 0.31 | 0.016 | 0.21 | 33.82  | 1226C > T         | T409M        | No variant | Carrier |
| N-110 | 0.27 | 0.015 | 0.14 | 33.99  | 1001T > C         | M334T        | No variant | Carrier |
| N-111 | 0.44 | 0.033 | ND   | 34.65  | 1246G > A         | A416T        | No variant | Carrier |
| N-112 | 0.34 | 0.018 | 0.32 | 36.40  | 609delC           | K204Sfs      | No variant | Carrier |
| N-113 | 0.40 | 0.019 | 0.35 | 36.42  | 1322_1323delinsTA | G441V        | No variant | Carrier |
| N-114 | 0.56 | 0.033 | 0.12 | 38.81  | 890AGA[2]         | K299del      | No variant | Carrier |
| N-115 | 0.78 | 0.029 | 0.29 | 38.85  | 553G > A          | G185S        | No variant | Carrier |
| N-116 | 0.31 | 0.016 | 0.11 | 39.17  | 709T > C          | C237R        | No variant | Carrier |
| N-117 | 0.40 | 0.022 | 0.11 | 39.18  | 790A > G          | K264E        | No variant | Carrier |
| N-118 | 0.54 | 0.030 | 0.09 | 39.35  | 1820G > C         | C607S        | No variant | Carrier |
| N-119 | 0.60 | 0.019 | ND   | 40.66  | 1246G > A         | A416T        | No variant | Carrier |
| N-120 | 0.42 | 0.023 | 0.26 | 41.32  | 1106T > A         | F369Y        | No variant | Carrier |
| N-121 | 0.43 | 0.028 | 0.30 | 42.72  | 553G > A          | G185S        | No variant | Carrier |
| N-122 | 0.71 | 0.038 | 0.11 | 44.50  | 1434G > A         | M478I        | No variant | Carrier |
| N-123 | 0.68 | 0.028 | ND   | 45.59  | 1349G > A         | R450H        | No variant | Carrier |
| N-124 | 0.41 | 0.019 | ND   | 45.95  | 136C > T          | Q46*         | No variant | Carrier |
| N-125 | 0.33 | 0.012 | 0.14 | 46.04  | 790A > G          | K264E        | No variant | Carrier |
| N-126 | 0.32 | 0.024 | 0.20 | 48.33  | 1375C > T         | R459W        | No variant | Carrier |
| N-127 | 0.35 | 0.017 | 0.06 | 52.29  | 865G > A          | G289R        | No variant | Carrier |
| N-128 | 0.30 | 0.02  | 0.21 | 53.64  | 1144A > C         | K382Q        | No variant | Carrier |
| N-129 | 0.28 | 0.015 | 0.10 | 53.73  | 298_299delCA      | Q100Vfs      | No variant | Carrier |
| N-130 | 0.20 | 0.020 | 0.16 | 55.86  | 334T > C          | F112L        | No variant | Carrier |
| N-131 | 0.56 | 0.031 | 0.22 | 56.08  | 71_77delTCACGGC   | L24Rfs       | No variant | Carrier |
| N-132 | 0.55 | 0.019 | ND   | 63.29  | 890AGA[2]         | K299del      | No variant | Carrier |
| N-133 | 0.43 | 0.016 | 0.13 | 66.59  | 1820G > C         | C607S        | No variant | Carrier |
| N-134 | 0.37 | 0.021 | 0.21 | 71.32  | 1820G > C         | C607S        | No variant | Carrier |
| N-135 | 0.28 | 0.009 | ND   | 70.27  |                   | Not analyzed |            | Normal  |
| N-136 | 0.40 | 0.022 | 0.07 | 76.82  | No variant        |              | No variant | Normal  |
| N-137 | 0.38 | 0.014 | ND   | 77.21  |                   | Not analyzed |            | Normal  |
| N-138 | 0.35 | 0.010 | 0.05 | 79.08  |                   | Not analyzed |            | Normal  |
| N-139 | 0.43 | 0.014 | 0.06 | 79.14  |                   | Not analyzed |            | Normal  |
| N-140 | 0.41 | 0.017 | ND   | 79.26  |                   | Not analyzed |            | Normal  |
| N-141 | 0.42 | 0.018 | ND   | 80.43  |                   | Not analyzed |            | Normal  |
| N-142 | 0.34 | 0.012 | 0.31 | 84.09  |                   | Not analyzed |            | Normal  |
| N-143 | 0.30 | 0.022 | 0.15 | 84.72  |                   | Not analyzed |            | Normal  |
| N-144 | 0.46 | 0.024 | 0.05 | 85.23  |                   | Not analyzed |            | Normal  |
| N-145 | 0.30 | 0.016 | 0.12 | 85.99  |                   | Not analyzed |            | Normal  |
| N-146 | 0.32 | 0.017 | 0.09 | 89.60  |                   | Not analyzed |            | Normal  |
| N-147 | 0.47 | 0.022 | 0.07 | 90.34  |                   | Not analyzed |            | Normal  |
| N-148 | 0.30 | 0.012 | 0.11 | 90.35  |                   | Not analyzed |            | Normal  |
| N-149 | 0.33 | 0.015 | 0.10 | 90.76  |                   | Not analyzed |            | Normal  |
| N-150 | 0.33 | 0.015 | 0.13 | 93.07  |                   | Not analyzed |            | Normal  |
| N-151 | 0.32 | 0.013 | 0.07 | 96.59  |                   | Not analyzed |            | Normal  |
| N-152 | 0.31 | 0.012 | 0.16 | 97.74  |                   | Not analyzed |            | Normal  |
| N-153 | 0.35 | 0.012 | 0.10 | 98.09  |                   | Not analyzed |            | Normal  |
| N-154 | 0.31 | 0.014 | 0.03 | 98.33  |                   | Not analyzed |            | Normal  |
| N-155 | 0.40 | 0.018 | 0.07 | 100.68 |                   | Not analyzed |            | Normal  |
| N-156 | 0.41 | 0.014 | 0.11 | 101.06 |                   | Not analyzed |            | Normal  |
| N-157 | 0.37 | 0.025 | ND   | 107.60 |                   | Not analyzed |            | Normal  |
| N-158 | 0.35 | 0.014 | 0.07 | 108.30 |                   | Not analyzed |            | Normal  |

|                                                                                  |                         |       |      |        |                       |                |                     |       |                    |
|----------------------------------------------------------------------------------|-------------------------|-------|------|--------|-----------------------|----------------|---------------------|-------|--------------------|
| N-159                                                                            | 0.40                    | 0.015 | 0.15 | 108.79 |                       |                | Not analyzed        |       | Normal             |
| N-160                                                                            | 0.31                    | 0.010 | 0.08 | 108.94 |                       |                | Not analyzed        |       | Normal             |
| N-161                                                                            | 0.32                    | 0.012 | 0.14 | 109.81 |                       |                | Not analyzed        |       | Normal             |
| N-162                                                                            | 0.30                    | 0.016 | 0.04 | 110.44 |                       |                | Not analyzed        |       | Normal             |
| N-163                                                                            | 0.34                    | 0.015 | 0.14 | 110.94 |                       |                | Not analyzed        |       | Normal             |
| N-164                                                                            | 0.31                    | 0.020 | 0.18 | 115.52 |                       |                | Not analyzed        |       | Normal             |
| N-165                                                                            | 0.38                    | 0.014 | 0.07 | 117.77 |                       |                | Not analyzed        |       | Normal             |
| N-166                                                                            | 0.34                    | 0.019 | ND   | 118.42 |                       |                | Not analyzed        |       | Normal             |
| N-167                                                                            | 0.40                    | 0.015 | ND   | 128.59 |                       |                | Not analyzed        |       | Normal             |
| N-168                                                                            | 0.33                    | 0.012 | 0.11 | 135.15 |                       |                | Not analyzed        |       | Normal             |
| N-169                                                                            | 0.37                    | 0.012 | 0.07 | 135.23 |                       |                | Not analyzed        |       | Normal             |
| N-170                                                                            | 0.37                    | 0.012 | 0.09 | 140.45 |                       |                | Not analyzed        |       | Normal             |
| N-171                                                                            | 0.35                    | 0.010 | 0.13 | 145.44 |                       |                | Not analyzed        |       | Normal             |
| N-172                                                                            | 0.37                    | 0.016 | 0.05 | 150.32 |                       |                | Not analyzed        |       | Normal             |
| N-173                                                                            | 0.39                    | 0.012 | 0.14 | 167.59 |                       |                | Not analyzed        |       | Normal             |
| N-174                                                                            | 0.31                    | 0.013 | 0.05 | 169.66 |                       |                | Not analyzed        |       | Normal             |
| N-175                                                                            | 0.35                    | 0.011 | 0.13 | 208.67 |                       |                | Not analyzed        |       | Normal             |
| Patients with VLCAD deficiency diagnosed after presenting with clinical symptoms |                         |       |      |        |                       |                |                     |       | Clinical phenotype |
| S-01                                                                             | Not enrolled in the NBS |       | 4.08 | 0.81   | 1332G > A             | K444=          | 1332G > A           | K444= | Severe             |
| S-02                                                                             | Not enrolled in the NBS |       | 5.11 | 2.59   | 652G > A              | E218K          | 652G > A            | E218K | Severe             |
| S-03                                                                             | Not enrolled in the NBS |       | 3.46 | 2.75   | 538G > A              | A180T          | 603C > A            | Y201* | Hypoglycemic       |
| S-04                                                                             | Not enrolled in the NBS |       | 0.97 | 3.07   | 796C > G<br>1153C > T | P266A<br>R385W | 1269G > A           | S423= | Hypoglycemic       |
| S-05                                                                             | Not enrolled in the NBS |       | 6.49 | 5.55   | 996dupT               | A333Cfs        | 1144A > C           | K382Q | Hypoglycemic       |
| S-06                                                                             | Not enrolled in the NBS |       | 2.62 | 9.75   | 520G > A              | V174M          | 1349G > A           | R450H | Hypoglycemic       |
| S-07                                                                             | Not enrolled in the NBS |       | 0.82 | 6.41   | 996dupT               | A333Cfs        | 1639G > A           | V547M | Myopathic          |
| S-08                                                                             | Not enrolled in the NBS |       | 0.84 | 6.47   | 1332G > A             | K444=          | 1349G > A           | R450H | Myopathic          |
| S-09                                                                             | Not enrolled in the NBS |       | 5.80 | 6.60   | 514C > G              | L172V          | 623-18_623-16delTAG |       | Myopathic          |
| S-10                                                                             | Not enrolled in the NBS |       | 3.72 | 6.95   | 796C > G              | P266A          | 1153C > T           | R385W | Myopathic          |
| S-11                                                                             | Not enrolled in the NBS |       | 6.11 | 7.66   | 906C > G              | I302M          | 1246G > A           | A416T | Myopathic          |
| S-12                                                                             | Not enrolled in the NBS |       | 0.69 | 12.16  | 790A > G              | K264E          | 1793A > G           | H598R | Myopathic          |
| S-13                                                                             | Not enrolled in the NBS |       | 3.66 | 12.39  | 833_835delAGA         | K278del        | 1349G > A           | R450H | Myopathic          |
| S-14                                                                             | Not enrolled in the NBS |       | 1.75 | 13.72  | 790A > G              | K264E          | 1048G > A           | G350S | Myopathic          |

Abbreviations: NBS, newborn screening; VLCAD, very-long-chain acyl-CoA dehydrogenase; ND, no data

<sup>1</sup> Mean reference VLCAD activity in 54 normal control adults is 149.9 ± 57.1 pmol/min/10<sup>6</sup> lymphocytes.

<sup>2</sup> Most of the variants have been described in a previous report [18].
