# Supplementary material
Source: MDPI journal article supplement (https://www.mdpi.com/2409-515X/10/1/15)
Supplement: s1 [file s1]

**Table S2.** Concentrations of acylcarnitines and free carnitine in dried blood specimens of newborns.

| Case ID | Acylcarnitine Levels in Dried Blood Specimens of Newborns (nmol/mL) |      |       |        |       |      |      |       |       |       |       |      |        |       |
|---------|---------------------------------------------------------------------|------|-------|--------|-------|------|------|-------|-------|-------|-------|------|--------|-------|
|         | C18:1                                                               | C18  | C16   | C16-OH | C14:1 | C14  | C12  | C10   | C8    | C6    | C4    | C3   | C2     | C0    |
| N-01    | ND                                                                  | 1.61 | 4.71  | 0.04   | 3.38  | 1.70 | ND   | 0.168 | 0.076 | ND    | ND    | 0.84 | 11.97  | 21.57 |
| N-02    | ND                                                                  | 0.92 | 2.24  | 0.016  | 1.26  | ND   | ND   | 0.067 | 0.046 | ND    | ND    | 1.09 | 9.24   | 17.16 |
| N-03    | 3.62                                                                | 3.81 | 12.70 | 0.051  | 4.29  | 4.24 | 0.70 | 0.204 | 0.068 | ND    | ND    | 1.24 | 11.370 | 36.97 |
| N-04    | 0.71                                                                | 0.55 | 1.72  | 0.01   | 0.78  | 0.42 | 0.35 | 0.12  | 0.06  | 0.03  | 0.12  | 0.94 | 12.43  | 12.82 |
| N-05    | 5.28                                                                | 3.16 | 9.06  | 0.09   | 5.65  | 4.28 | 1.07 | 0.30  | 0.11  | 0.06  | 0.17  | 0.72 | 13.96  | 25.98 |
| N-06    | 1.43                                                                | 0.81 | 2.50  | 0.02   | 0.96  | 0.63 | 0.66 | 0.18  | 0.08  | 0.04  | 0.22  | 2.31 | 21.70  | 23.80 |
| N-07    | ND                                                                  | 1.15 | 2.62  | 0.024  | 0.65  | ND   | ND   | 0.164 | 0.081 | ND    | ND    | 1.38 | 13.36  | 27.24 |
| N-08    | 2.32                                                                | 0.80 | 2.56  | 0.012  | 0.42  | 0.26 | 0.18 | 0.077 | 0.084 | 0.018 | 0.10  | 1.93 | 19.20  | 13.00 |
| N-09    | 2.05                                                                | 1.21 | 3.02  | 0.02   | 2.80  | ND   | 0.55 | 0.20  | 0.13  | ND    | ND    | 0.79 | 6.04   | 22.39 |
| N-10    | 1.97                                                                | 1.39 | 3.63  | 0.03   | 2.23  | 1.11 | 0.55 | 0.18  | 0.07  | 0.04  | ND    | 2.59 | 25.04  | 24.91 |
| N-11    | 2.59                                                                | 2.25 | 5.28  | 0.04   | 2.73  | 1.96 | 0.70 | 0.13  | 0.07  | 0.06  | 0.18  | 1.43 | 19.10  | 26.35 |
| N-12    | 1.07                                                                | 0.86 | 2.31  | 0.02   | 0.40  | 0.28 | 0.23 | 0.11  | 0.07  | 0.03  | 0.14  | 1.36 | 12.16  | 18.39 |
| N-13    | 1.43                                                                | 0.83 | 1.88  | 0.018  | 0.40  | 0.34 | 0.32 | 0.15  | 0.07  | 0.02  | 0.12  | 1.82 | 16.70  | 22.08 |
| N-14    | 2.32                                                                | 1.34 | 4.62  | 0.056  | 4.79  | 1.85 | 1.21 | 0.342 | 0.175 | 0.076 | 0.21  | 1.98 | 32.40  | 22.50 |
| N-15    | 1.47                                                                | 0.99 | 2.07  | 0.01   | 0.61  | 0.30 | ND   | 0.061 | 0.037 | ND    | ND    | 0.84 | 12.02  | 27.39 |
| N-16    | 1.75                                                                | 0.91 | 2.20  | 0.01   | 0.90  | 0.54 | 0.27 | 0.07  | 0.05  | 0.03  | 0.14  | 1.55 | 12.95  | 24.62 |
| N-17    | 0.97                                                                | 0.41 | 0.86  | 0.02   | 0.46  | 0.23 | 0.16 | 0.06  | 0.04  | ND    | ND    | 1.21 | 11.20  | 18.70 |
| N-18    | 2.47                                                                | 2.67 | 4.88  | 0.048  | 2.21  | 1.63 | 0.49 | 0.09  | 0.06  | 0.04  | 0.09  | 0.69 | 19.88  | 24.00 |
| N-19    | 1.84                                                                | 0.94 | 2.56  | 0.02   | 0.42  | 0.30 | 0.26 | 0.12  | 0.06  | 0.03  | 0.16  | 1.70 | 18.90  | 23.00 |
| N-20    | 1.39                                                                | 0.73 | 2.04  | 0.01   | 1.08  | 0.46 | 0.36 | 0.12  | 0.07  | 0.05  | 0.20  | 1.57 | 9.99   | 20.06 |
| N-21    | 1.39                                                                | 1.18 | 2.58  | 0.025  | 1.17  | 0.61 | 0.43 | 0.121 | 0.084 | ND    | ND    | 1.73 | 15.89  | 31.67 |
| N-22    | 0.81                                                                | 0.62 | 0.93  | 0.01   | 0.31  | 0.19 | 0.14 | 0.04  | 0.04  | 0.02  | 0.09  | 0.61 | 4.28   | 12.51 |
| N-23    | 1.75                                                                | 1.13 | 2.56  | 0.02   | 0.68  | 0.31 | 0.30 | 0.133 | 0.087 | 0.046 | 0.25  | 2.25 | 25.80  | 23.10 |
| N-24    | 1.36                                                                | 0.89 | 2.89  | 0.028  | 1.37  | 0.82 | 0.41 | 0.165 | 0.065 | 0.04  | 0.155 | 1.96 | 19.52  | 19.21 |
| N-25    | 1.01                                                                | 0.68 | 1.60  | 0.02   | 0.33  | 0.22 | 0.19 | 0.08  | 0.06  | 0.03  | 0.14  | 1.44 | 10.87  | 20.23 |
| N-26    | 1.71                                                                | 1.29 | 2.76  | 0.027  | 1.16  | 0.57 | 0.40 | 0.13  | 0.09  | 0.07  | 0.15  | 0.94 | 20.85  | 22.25 |
| N-27    | 0.84                                                                | 0.64 | 1.92  | 0.014  | 0.37  | 0.29 | 0.22 | 0.08  | 0.04  | 0.02  | ND    | 1.30 | 14.55  | 13.12 |
| N-28    | 1.74                                                                | 1.14 | 4.19  | 0.027  | 1.31  | ND   | ND   | ND    | 0.05  | 0.03  | 0.10  | ND   | 10.31  | ND    |
| N-29    | 1.19                                                                | 0.80 | 2.00  | 0.02   | 0.61  | 0.40 | 0.33 | 0.13  | 0.08  | 0.04  | 0.16  | 1.08 | 11.21  | 17.69 |
| N-30    | 1.82                                                                | 1.54 | 2.86  | 0.02   | 0.95  | 0.53 | 0.28 | 0.06  | 0.03  | 0.03  | 0.15  | 1.05 | 13.65  | 26.89 |
| N-31    | 1.07                                                                | 0.80 | 2.98  | 0.02   | 0.97  | 0.57 | 0.26 | 0.10  | 0.05  | 0.04  | 0.14  | 1.43 | 16.55  | 22.40 |
| N-32    | 1.78                                                                | 0.98 | 3.28  | 0.018  | 1.08  | 0.60 | 0.31 | 0.12  | 0.05  | 0.03  | 0.20  | 2.02 | 17.31  | 25.16 |
| N-33    | 0.76                                                                | 0.58 | 1.87  | 0.013  | 0.46  | 0.31 | 0.20 | 0.08  | 0.04  | 0.02  | 0.11  | 0.86 | 8.42   | 20.05 |
| N-34    | 1.64                                                                | 1.02 | 4.00  | 0.041  | 1.37  | 0.80 | 0.86 | 0.362 | 0.184 | 0.063 | 0.211 | 1.50 | 38.25  | 21.43 |
| N-35    | 1.51                                                                | 0.72 | 2.10  | 0.01   | 0.52  | 0.36 | 0.31 | 0.12  | 0.08  | 0.03  | 0.11  | 1.60 | 14.20  | 18.10 |
| N-36    | 1.52                                                                | 0.80 | 2.29  | 0.01   | 0.48  | 0.37 | 0.25 | 0.07  | 0.04  | ND    | ND    | 1.30 | 14.25  | 22.97 |
| N-37    | 1.18                                                                | 1.13 | 3.67  | 0.024  | 0.57  | 0.44 | 0.45 | 0.206 | 0.116 | 0.038 | 0.145 | 2.28 | 18.88  | 25.95 |
| N-38    | 1.95                                                                | 0.89 | 3.09  | 0.02   | 1.03  | 0.64 | 0.64 | 0.21  | 0.12  | 0.04  | 0.16  | 1.59 | 15.20  | 19.60 |
| N-39    | 1.65                                                                | 1.10 | 3.38  | 0.04   | 0.67  | 0.47 | 0.36 | 0.14  | 0.10  | 0.07  | 0.18  | 2.19 | 16.21  | 20.91 |
| N-40    | ND                                                                  | 1.09 | 3.39  | 0.032  | 1.24  | ND   | ND   | 0.102 | 0.079 | ND    | ND    | 1.01 | 12.29  | 21.44 |
| N-41    | 0.74                                                                | 0.59 | 1.48  | 0.011  | 0.25  | 0.16 | 0.09 | 0.06  | 0.03  | 0.02  | 0.09  | 0.66 | 7.16   | 12.98 |
| N-42    | 1.70                                                                | 0.89 | 2.62  | 0.015  | 0.40  | 0.34 | 0.20 | 0.09  | 0.05  | 0.04  | 0.21  | 2.32 | 24.16  | 34.67 |
| N-43    | 1.33                                                                | 1.00 | 1.98  | 0.01   | 0.44  | 0.26 | 0.15 | 0.03  | 0.02  | ND    | ND    | 0.95 | 5.62   | 18.30 |
| N-44    | 1.22                                                                | 0.90 | 2.35  | 0.02   | 0.48  | 0.41 | 0.24 | 0.12  | 0.09  | 0.03  | 0.13  | 1.17 | 13.39  | 19.37 |

|      |      |      |      |       |      |      |      |       |       |       |       |      |       |       |
|------|------|------|------|-------|------|------|------|-------|-------|-------|-------|------|-------|-------|
| N-45 | 2.92 | 2.91 | 9.54 | 0.10  | 4.57 | 4.29 | 0.72 | 0.34  | 0.11  | 0.13  | 0.09  | 0.73 | 12.40 | 20.10 |
| N-46 | ND   | 0.74 | 2.36 | 0.015 | 0.27 | 0.24 | 0.21 | 0.072 | 0.035 | 0.018 | 0.136 | 2.13 | 11.03 | 18.80 |
| N-47 | 1.42 | 0.78 | 2.16 | 0.011 | 0.48 | 0.34 | 0.24 | 0.13  | 0.05  | 0.02  | 0.09  | 1.18 | 11.50 | 15.90 |
| N-48 | 1.34 | 0.95 | 3.09 | 0.032 | 1.15 | 0.58 | 0.68 | 0.454 | 0.182 | 0.059 | 0.152 | 0.95 | 21.86 | 16.39 |
| N-49 | ND   | ND   | 4.15 | 0.07  | 1.76 | 1.06 | 1.16 | 0.34  | 0.29  | 0.13  | 0.08  | 1.66 | 19.30 | 21.20 |
| N-50 | 1.17 | 0.70 | 2.57 | 0.017 | 0.46 | ND   | ND   | ND    | 0.06  | ND    | ND    | ND   | 21.90 | ND    |
| N-51 | ND   | 1.48 | 4.90 | 0.06  | 0.90 | ND   | ND   | 0.25  | 0.13  | ND    | ND    | 1.38 | 23.45 | 19.89 |
| N-52 | 1.10 | 0.56 | 1.71 | 0.018 | 0.46 | 0.23 | 0.24 | 0.14  | 0.074 | 0.032 | 0.105 | 1.90 | 13.86 | 19.97 |
| N-53 | 1.31 | 0.86 | 1.92 | 0.02  | 0.41 | 0.25 | 0.24 | 0.13  | 0.06  | 0.04  | 0.12  | 1.41 | 15.59 | 23.15 |
| N-54 | 1.70 | 0.88 | 2.67 | 0.015 | 0.37 | 0.36 | 0.25 | 0.088 | 0.049 | ND    | ND    | 1.77 | 14.78 | 21.45 |
| N-55 | 1.72 | 1.13 | 3.32 | 0.02  | 1.05 | 0.73 | 0.48 | 0.10  | 0.06  | ND    | ND    | 0.97 | 16.22 | 27.38 |
| N-56 | 0.99 | 1.14 | 1.74 | UD    | 0.35 | 0.20 | 0.17 | 0.05  | 0.03  | 0.02  | 0.10  | 0.98 | 6.69  | 24.84 |
| N-57 | 1.62 | 1.05 | 3.58 | 0.029 | 0.74 | 0.40 | 0.40 | 0.21  | 0.10  | 0.04  | 0.15  | 0.74 | 14.07 | 24.10 |
| N-58 | 1.28 | 0.89 | 2.45 | 0.02  | 0.61 | 0.36 | 0.31 | 0.10  | 0.06  | 0.04  | 0.19  | 0.98 | 8.64  | 14.82 |
| N-59 | 1.60 | 0.95 | 2.88 | 0.015 | 0.33 | 0.40 | 0.19 | 0.06  | 0.04  | 0.03  | 0.15  | 2.38 | 17.21 | 32.34 |
| N-60 | 1.74 | 1.01 | 3.70 | 0.03  | 0.46 | 0.39 | ND   | 0.189 | 0.11  | ND    | ND    | 1.40 | 23.77 | 14.13 |
| N-61 | 1.29 | 1.05 | 2.60 | 0.02  | 0.42 | 0.40 | 0.29 | 0.10  | 0.05  | 0.02  | 0.13  | 1.67 | 15.38 | 15.64 |
| N-62 | 1.61 | 1.04 | 3.26 | 0.031 | 1.59 | 0.67 | 0.66 | 0.20  | 0.08  | 0.04  | 0.21  | 1.58 | 27.28 | 24.70 |
| N-63 | 1.53 | 0.90 | 2.17 | 0.01  | 0.53 | 0.31 | 0.24 | 0.09  | 0.04  | 0.03  | 0.13  | 1.64 | 11.50 | 21.60 |
| N-64 | 1.00 | 0.70 | 1.77 | 0.01  | 0.42 | 0.29 | 0.24 | 0.11  | 0.08  | 0.03  | 0.14  | 1.01 | 10.83 | 16.17 |
| N-65 | 1.24 | 0.58 | 1.46 | 0.02  | 1.53 | 0.53 | 0.71 | 0.34  | 0.15  | 0.05  | 0.15  | 1.14 | 13.80 | 22.00 |
| N-66 | 1.88 | 1.04 | 3.79 | 0.03  | 1.51 | 0.84 | 0.59 | 0.14  | 0.07  | 0.04  | 0.21  | 1.52 | 22.08 | 21.16 |
| N-67 | 1.20 | 0.80 | 1.43 | 0.01  | 0.31 | 0.19 | 0.17 | 0.09  | 0.04  | 0.03  | 0.17  | 0.90 | 9.11  | 9.90  |
| N-68 | ND   | 0.97 | 3.13 | 0.03  | 1.00 | 0.70 | 0.37 | 0.208 | 0.11  | ND    | ND    | 1.28 | 20.72 | 36.15 |
| N-69 | 0.96 | 0.74 | 1.58 | 0.02  | 0.30 | 0.21 | 0.20 | 0.10  | 0.08  | 0.03  | 0.25  | 1.20 | 11.53 | 15.49 |
| N-70 | 0.69 | 0.41 | 1.29 | 0.01  | 0.44 | 0.22 | 0.21 | 0.08  | 0.05  | ND    | ND    | 1.29 | 12.18 | 15.91 |
| N-71 | 1.53 | 0.86 | 3.29 | 0.023 | 0.51 | 0.43 | 0.39 | 0.20  | 0.067 | 0.042 | 0.373 | 1.97 | 12.77 | 24.28 |
| N-72 | 1.22 | 0.92 | 2.37 | 0.014 | 0.40 | 0.27 | 0.21 | 0.16  | 0.07  | 0.04  | 0.11  | 1.42 | 14.92 | 17.83 |
| N-73 | 1.57 | 1.31 | 3.35 | 0.018 | 0.40 | 0.37 | 0.18 | 0.10  | 0.03  | 0.02  | 0.14  | 1.86 | 21.15 | 23.95 |
| N-74 | 0.76 | 0.47 | 1.51 | 0.014 | 0.43 | 0.24 | 0.25 | 0.099 | 0.05  | ND    | ND    | 0.96 | 9.75  | 15.82 |
| N-75 | 1.78 | 1.25 | 3.23 | 0.028 | 1.81 | 0.97 | 0.44 | 0.14  | 0.08  | 0.04  | 0.32  | 2.44 | 16.20 | 26.34 |
| N-76 | 1.07 | 0.88 | 1.98 | 0.017 | 0.35 | 0.36 | 0.27 | 0.16  | 0.06  | 0.03  | 0.14  | 0.79 | 15.34 | 15.34 |
| N-77 | 1.44 | 0.80 | 2.81 | 0.01  | 0.46 | ND   | 0.33 | 0.20  | 0.10  | 0.03  | ND    | 2.33 | 18.55 | 13.85 |
| N-78 | 1.35 | 0.83 | 1.74 | 0.012 | 0.30 | 0.25 | 0.15 | 0.10  | 0.04  | 0.03  | 0.13  | 1.71 | 12.84 | 23.20 |
| N-79 | 0.99 | 0.55 | 1.49 | 0.012 | 0.39 | 0.24 | 0.26 | 0.39  | 0.08  | 0.03  | 0.17  | 1.50 | 8.75  | 13.90 |
| N-80 | 1.83 | 1.27 | 3.91 | 0.018 | 0.41 | 0.42 | 0.23 | 0.079 | 0.052 | 0.04  | 0.121 | 1.52 | 21.21 | 22.57 |
| N-81 | 0.97 | 0.60 | 1.93 | 0.02  | 0.45 | 0.30 | 0.41 | 0.16  | 0.09  | 0.04  | 0.06  | 0.96 | 14.51 | 8.89  |
| N-82 | 1.50 | 0.95 | 2.18 | 0.017 | 0.40 | 0.32 | 0.15 | 0.06  | 0.03  | 0.02  | 0.11  | 1.17 | 11.35 | 13.60 |
| N-83 | 1.83 | 0.93 | 2.27 | 0.012 | 0.39 | 0.25 | 0.21 | 0.16  | 0.07  | 0.03  | 0.22  | 2.42 | 19.39 | 27.14 |
| N-84 | 0.95 | 0.69 | 2.22 | 0.014 | 0.48 | 0.31 | 0.23 | 0.13  | 0.06  | 0.03  | 0.20  | 1.26 | 15.63 | 13.70 |
| N-85 | 0.81 | 0.53 | 1.50 | 0.02  | 0.45 | 0.30 | 0.24 | 0.10  | 0.07  | 0.03  | 0.14  | 1.38 | 13.63 | 15.11 |
| N-86 | ND   | 1.57 | 5.66 | 0.03  | 0.63 | 0.56 | 0.42 | 0.158 | 0.086 | ND    | ND    | 1.80 | 22.57 | 21.28 |
| N-87 | 1.31 | 0.62 | 2.48 | 0.02  | 0.44 | 0.33 | 0.24 | 0.14  | 0.10  | 0.03  | 0.31  | 2.07 | 11.35 | 16.42 |
| N-88 | 1.66 | 0.79 | 5.17 | 0.049 | 0.62 | 0.59 | 0.49 | 0.155 | 0.089 | 0.037 | 0.124 | 1.54 | 21.83 | 28.62 |
| N-89 | 1.15 | 1.05 | 2.62 | 0.028 | 0.71 | 0.49 | 0.42 | 0.174 | 0.105 | 0.063 | 0.208 | 1.16 | 18.68 | 25.18 |
| N-90 | 1.87 | 1.32 | 3.07 | 0.02  | 0.89 | 0.49 | 0.37 | 0.15  | 0.09  | 0.05  | 0.38  | 1.74 | 13.82 | 17.15 |
| N-91 | ND   | ND   | ND   | 0.03  | 0.66 | ND   | ND   | 0.119 | 0.08  | ND    | ND    | 1.19 | 20.56 | ND    |

|       |      |      |      |       |      |      |      |       |       |       |       |      |       |       |
|-------|------|------|------|-------|------|------|------|-------|-------|-------|-------|------|-------|-------|
| N-92  | 1.88 | 0.86 | 2.93 | 0.023 | 0.56 | 0.40 | 0.34 | 0.181 | 0.109 | ND    | ND    | 1.82 | 24.22 | 18.58 |
| N-93  | 1.16 | 0.67 | 2.66 | 0.017 | 0.42 | 0.25 | 0.41 | 0.20  | 0.102 | 0.038 | 0.143 | 0.83 | 16.60 | n9.48 |
| N-94  | 1.66 | 1.17 | 3.19 | 0.02  | 0.80 | 0.49 | 0.41 | 0.13  | 0.07  | 0.04  | 0.20  | 1.19 | 17.81 | 15.70 |
| N-95  | 1.58 | 0.83 | 3.01 | 0.019 | 0.47 | 0.28 | 0.41 | 0.32  | 0.16  | 0.08  | 0.23  | 2.28 | 23.54 | 22.53 |
| N-96  | 1.30 | 0.46 | 3.08 | 0.02  | 0.41 | ND   | ND   | 0.31  | 0.16  | ND    | ND    | 1.27 | 20.83 | 26.80 |
| N-97  | 1.32 | 0.61 | 2.50 | 0.022 | 0.30 | 0.25 | 0.29 | 0.09  | 0.09  | 0.03  | 0.15  | 1.20 | 16.08 | 15.46 |
| N-98  | 1.37 | 0.85 | 3.71 | 0.04  | 0.60 | 0.55 | 0.51 | 0.21  | 0.09  | 0.03  | 0.19  | 1.96 | 22.30 | 15.13 |
| N-99  | 1.70 | 1.03 | 4.35 | 0.031 | 0.59 | 0.52 | 0.47 | 0.305 | 0.156 | 0.068 | 0.158 | 1.56 | 33.95 | 30.34 |
| N-100 | 1.03 | 0.96 | 2.27 | 0.023 | 0.24 | 0.21 | 0.20 | 0.12  | 0.08  | 0.03  | 0.13  | 0.98 | 13.95 | 11.80 |
| N-101 | 0.90 | 0.67 | 1.82 | 0.01  | 0.20 | 0.19 | 0.12 | 0.10  | 0.05  | 0.02  | 0.13  | 1.13 | 8.80  | 10.10 |
| N-102 | 1.63 | 1.04 | 3.06 | 0.018 | 0.40 | 0.27 | 0.20 | 0.074 | 0.042 | 0.037 | 0.132 | 1.33 | 17.22 | 25.04 |
| N-103 | 1.77 | 1.03 | 3.17 | 0.021 | 0.36 | 0.28 | 0.30 | 0.20  | 0.12  | 0.05  | 0.23  | 2.07 | 30.04 | 39.32 |
| N-104 | 1.58 | 0.96 | 2.81 | 0.018 | 0.48 | 0.31 | 0.37 | 0.26  | 0.16  | 0.06  | 0.026 | 2.08 | 16.30 | 21.60 |
| N-105 | 1.30 | ND   | 3.18 | 0.031 | 0.98 | ND   | 0.54 | 0.236 | 0.097 | 0.032 | 0.211 | 1.62 | 16.64 | 18.90 |
| N-106 | 1.75 | 0.96 | 3.66 | 0.05  | 1.28 | 0.76 | 1.00 | 0.37  | 0.19  | 0.11  | ND    | 1.27 | 21.57 | 15.51 |
| N-107 | 1.34 | 0.80 | 2.98 | 0.024 | 0.39 | 0.21 | 0.29 | 0.17  | 0.10  | 0.07  | ND    | 0.95 | 23.06 | 21.62 |
| N-108 | 1.36 | 0.66 | 2.40 | 0.02  | 0.43 | 0.31 | 0.45 | 0.45  | 0.19  | 0.05  | 0.20  | 1.59 | 18.70 | 21.10 |
| N-109 | 1.94 | 1.26 | 3.63 | 0.03  | 0.31 | 0.34 | 0.23 | 0.12  | 0.09  | 0.06  | 0.42  | 1.59 | 19.19 | 11.59 |
| N-110 | 0.88 | 0.82 | 3.10 | 0.011 | 0.27 | 0.31 | 0.24 | 0.19  | 0.11  | 0.05  | 0.25  | 1.29 | 17.70 | 13.90 |
| N-111 | 1.38 | 0.64 | 2.38 | 0.02  | 0.44 | ND   | 0.48 | 0.37  | 0.18  | ND    | ND    | 0.94 | 13.42 | 18.44 |
| N-112 | 1.09 | 1.01 | 3.27 | 0.028 | 0.34 | 0.32 | 0.31 | 0.26  | 0.09  | 0.03  | 0.16  | 0.80 | 19.50 | 13.70 |
| N-113 | 1.17 | 0.67 | 2.88 | 0.019 | 0.40 | 0.37 | 0.27 | 0.14  | 0.07  | 0.04  | 0.24  | 1.23 | 16.45 | 17.08 |
| N-114 | 1.21 | 0.65 | 2.67 | 0.02  | 0.56 | 0.32 | 0.53 | 0.38  | 0.15  | 0.03  | 0.20  | 1.03 | 16.87 | 18.69 |
| N-115 | 2.09 | 1.23 | 5.92 | 0.051 | 0.78 | 0.80 | 0.57 | 0.25  | 0.10  | 0.04  | 0.38  | 2.46 | 25.15 | 17.59 |
| N-116 | 1.08 | 0.66 | 2.79 | 0.03  | 0.31 | 0.29 | 0.26 | 0.29  | 0.15  | 0.05  | 0.15  | 0.93 | 18.13 | 16.49 |
| N-117 | 0.96 | 0.65 | 3.12 | 0.026 | 0.40 | 0.33 | 0.38 | 0.22  | 0.11  | 0.04  | 0.25  | 1.57 | 15.58 | 17.33 |
| N-118 | 1.30 | 0.74 | 2.74 | 0.02  | 0.54 | 0.31 | 0.35 | 0.17  | 0.08  | 0.04  | 0.19  | 2.39 | 18.08 | 20.53 |
| N-119 | 1.92 | 2.10 | 4.90 | UD    | 0.60 | ND   | 0.60 | 0.60  | 0.30  | 0.07  | ND    | 1.50 | 31.00 | 14.00 |
| N-120 | 1.43 | 0.60 | 2.88 | 0.02  | 0.42 | 0.35 | 0.39 | 0.23  | 0.11  | ND    | ND    | 1.78 | 18.70 | 12.98 |
| N-121 | 1.36 | 0.88 | 2.73 | 0.035 | 0.43 | 0.30 | 0.38 | 0.27  | 0.14  | 0.05  | 0.22  | 1.36 | 15.20 | 8.15  |
| N-122 | 1.01 | 0.74 | 2.84 | 0.04  | 0.71 | 0.42 | 0.72 | 0.44  | 0.24  | 0.12  | 0.22  | 0.73 | 18.56 | 9.71  |
| N-123 | 1.64 | 1.00 | 4.29 | 0.044 | 0.68 | 0.45 | 0.73 | 0.477 | 0.207 | 0.045 | 0.275 | 2.32 | 28.23 | 19.30 |
| N-124 | 1.00 | 0.55 | 4.41 | 0.012 | 0.41 | 0.30 | 0.42 | 0.30  | 0.13  | ND    | ND    | 1.64 | 21.83 | 14.09 |
| N-125 | 1.61 | 0.90 | 4.35 | 0.02  | 0.33 | 0.34 | 0.31 | 0.18  | 0.11  | 0.03  | 0.25  | 2.07 | 27.00 | 17.24 |
| N-126 | 1.58 | 0.79 | 2.65 | 0.015 | 0.32 | 0.27 | 0.29 | 0.25  | 0.09  | 0.03  | 0.16  | 1.08 | 12.93 | 14.30 |
| N-127 | 1.51 | 0.96 | 3.88 | 0.037 | 0.35 | 0.41 | 0.35 | 0.20  | 0.10  | 0.06  | 0.19  | 0.84 | 21.46 | 8.69  |
| N-128 | 1.39 | 0.84 | 2.64 | 0.01  | 0.30 | 0.23 | 0.23 | 0.26  | 0.13  | 0.08  | 0.32  | 1.63 | 15.21 | 26.77 |
| N-129 | 1.48 | 0.86 | 3.33 | 0.02  | 0.28 | 0.30 | 0.25 | 0.14  | 0.11  | ND    | ND    | 1.00 | 18.59 | 11.43 |
| N-130 | 1.30 | 0.68 | 1.97 | 0.011 | 0.20 | 0.17 | 0.15 | 0.20  | 0.08  | 0.02  | 0.11  | 0.83 | 9.90  | 12.68 |
| N-131 | ND   | 0.60 | 2.23 | 0.02  | 0.56 | 0.38 | 0.49 | 0.33  | 0.15  | ND    | ND    | 1.33 | 18.08 | 12.55 |
| N-132 | 1.73 | 0.95 | 3.75 | 0.02  | 0.55 | 0.40 | 0.31 | 0.24  | 0.08  | 0.03  | 0.14  | 2.30 | 28.63 | 21.61 |
| N-133 | 1.28 | 0.65 | 2.69 | 0.019 | 0.43 | 0.33 | 0.47 | 0.36  | 0.16  | 0.07  | 0.18  | 1.15 | 26.57 | 15.36 |
| N-134 | ND   | ND   | ND   | 0.02  | 0.37 | ND   | ND   | 0.184 | 0.09  | ND    | ND    | 2.00 | 17.14 | 26.79 |
| N-135 | ND   | 0.57 | 3.05 | 0.033 | 0.28 | 0.27 | 0.30 | 0.27  | 0.21  | ND    | ND    | 1.22 | 33.18 | 9.01  |
| N-136 | 1.22 | 0.68 | 2.88 | 0.04  | 0.40 | 0.24 | 0.48 | 0.372 | 0.146 | 0.06  | 0.132 | 0.62 | 18.01 | 8.73  |
| N-137 | 1.97 | 1.17 | 4.33 | 0.04  | 0.38 | 0.26 | 0.38 | 0.30  | 0.116 | 0.047 | 0.235 | 1.03 | 26.44 | 15.62 |
| N-138 | 1.61 | 0.83 | 3.83 | 0.029 | 0.35 | 0.36 | 0.36 | 0.29  | 0.17  | ND    | ND    | 2.01 | 36.08 | 15.65 |

|       |      |       |      |       |      |      |      |       |       |       |       |      |       |       |
|-------|------|-------|------|-------|------|------|------|-------|-------|-------|-------|------|-------|-------|
| N-139 | 1.81 | 0.72  | 3.23 | 0.044 | 0.43 | 0.30 | 0.24 | 0.29  | 0.21  | 0.08  | 0.31  | 2.32 | 31.45 | 13.12 |
| N-140 | 1.34 | 0.70  | 2.76 | 0.035 | 0.41 | 0.29 | 0.39 | 0.322 | 0.18  | 0.088 | 0.23  | 1.21 | 23.50 | 23.20 |
| N-141 | 1.06 | 0.52  | 2.30 | 0.026 | 0.42 | 0.26 | 0.47 | 0.348 | 0.173 | 0.074 | 0.254 | 1.51 | 22.59 | 15.12 |
| N-142 | 1.59 | 0.77  | 3.23 | 0.018 | 0.34 | 0.25 | 0.33 | 0.32  | 0.21  | 0.10  | 0.18  | 1.02 | 29.41 | 16.50 |
| N-143 | 1.36 | 0.91  | 3.13 | 0.022 | 0.30 | 0.30 | 0.25 | 0.19  | 0.11  | 0.04  | 0.23  | 2.17 | 13.34 | 21.82 |
| N-144 | 1.50 | 0.70  | 3.70 | 0.045 | 0.46 | 0.33 | 0.37 | 0.38  | 0.17  | 0.09  | 0.22  | 1.22 | 19.24 | 13.32 |
| N-145 | 1.70 | 0.82  | 3.99 | 0.034 | 0.30 | 0.31 | 0.33 | 0.44  | 0.23  | 0.09  | 0.2   | 1.57 | 19.42 | 13.00 |
| N-146 | 1.40 | 0.67  | 2.88 | 0.028 | 0.32 | 0.24 | 0.34 | 0.38  | 0.20  | 0.08  | 0.21  | 1.82 | 19.08 | 11.25 |
| N-147 | 1.72 | 0.62  | 3.08 | 0.04  | 0.47 | 0.29 | 0.32 | 0.36  | 0.20  | 0.08  | 0.12  | 1.42 | 21.28 | 11.16 |
| N-148 | 1.49 | 0.80  | 3.10 | 0.037 | 0.30 | 0.25 | 0.26 | 0.33  | 0.14  | 0.10  | 0.28  | 1.82 | 24.24 | 15.72 |
| N-149 | 1.40 | 0.73  | 3.80 | 0.045 | 0.33 | 0.28 | 0.27 | 0.32  | 0.16  | 0.06  | 0.20  | 1.14 | 21.86 | 17.73 |
| N-150 | 1.41 | 0.48  | 2.61 | 0.019 | 0.33 | 0.30 | 0.33 | 0.26  | 0.13  | 0.07  | 0.18  | 1.10 | 22.29 | 15.99 |
| N-151 | 1.54 | 1.11  | 3.60 | 0.033 | 0.32 | 0.28 | 0.32 | 0.40  | 0.16  | 0.09  | 0.30  | 1.16 | 25.00 | 13.82 |
| N-152 | 1.56 | 0.85  | 2.94 | 0.026 | 0.31 | 0.35 | 0.29 | 0.33  | 0.16  | 0.09  | 0.25  | 1.82 | 26.24 | 13.05 |
| N-153 | 1.90 | 0.85  | 3.88 | 0.044 | 0.35 | 0.30 | 0.40 | 0.25  | 0.11  | 0.06  | 0.22  | 0.92 | 29.39 | 25.21 |
| N-154 | 1.15 | 0.84  | 3.41 | 0.036 | 0.31 | 0.31 | 0.39 | 0.26  | 0.12  | 0.06  | 0.20  | 1.47 | 22.40 | 11.33 |
| N-155 | 1.27 | 0.60  | 2.63 | 0.038 | 0.40 | 0.26 | 0.28 | 0.33  | 0.19  | 0.09  | 0.26  | 1.08 | 22.05 | 10.64 |
| N-156 | 1.77 | 0.94  | 4.01 | 0.045 | 0.41 | 0.42 | 0.35 | 0.35  | 0.20  | 0.10  | 0.27  | 1.21 | 28.95 | 13.82 |
| N-157 | 1.17 | 0.59  | 2.81 | 0.059 | 0.37 | 0.30 | 0.33 | 0.22  | 0.12  | 0.067 | 0.35  | 0.80 | 15.20 | 8.70  |
| N-158 | 1.84 | 1.05  | 3.85 | 0.037 | 0.35 | 0.30 | 0.38 | 0.59  | 0.27  | 0.11  | 0.26  | 1.02 | 24.45 | 22.36 |
| N-159 | 1.87 | 1.09  | 4.14 | 0.041 | 0.40 | 0.41 | 0.30 | 0.28  | 0.19  | 0.08  | 0.31  | 1.47 | 25.72 | 21.32 |
| N-160 | ND   | 0.61  | 4.02 | 0.019 | 0.31 | 0.25 | 0.36 | 0.42  | 0.18  | ND    | ND    | 1.33 | 29.73 | 15.65 |
| N-161 | 1.83 | 0.96  | 3.40 | 0.034 | 0.32 | 0.29 | 0.28 | 0.25  | 0.12  | 0.08  | 0.35  | 2.86 | 26.41 | 16.68 |
| N-162 | 0.98 | 0.56  | 2.36 | 0.017 | 0.30 | 0.21 | 0.36 | 0.33  | 0.19  | 0.10  | 0.59  | 1.04 | 18.19 | 14.99 |
| N-163 | 1.54 | 1.14  | 4.04 | 0.039 | 0.34 | 0.42 | 0.37 | 0.25  | 0.14  | 0.06  | 0.23  | 1.18 | 22.70 | 10.27 |
| N-164 | 1.31 | 0.71  | 2.46 | 0.018 | 0.31 | 0.19 | 0.32 | 0.28  | 0.14  | 0.05  | 0.20  | 0.85 | 15.42 | 15.92 |
| N-165 | 1.55 | 0.70  | 3.54 | 0.032 | 0.38 | 0.29 | 0.34 | 0.55  | 0.25  | 0.10  | 0.41  | 1.30 | 27.97 | 13.22 |
| N-166 | 1.54 | 0.559 | 3.45 | 0.065 | 0.34 | 0.26 | 0.32 | 0.473 | 0.174 | 0.077 | 0.126 | 0.89 | 17.69 | 9.04  |
| N-167 | 1.58 | 1.00  | 3.51 | 0.04  | 0.40 | 0.36 | 0.42 | 0.64  | 0.28  | 0.12  | 0.23  | 1.03 | 26.60 | 24.20 |
| N-168 | 1.72 | 0.69  | 3.14 | 0.036 | 0.33 | 0.34 | 0.40 | 0.56  | 0.23  | 0.09  | 0.27  | 1.70 | 27.74 | 18.37 |
| N-169 | 1.71 | 0.92  | 4.35 | 0.037 | 0.37 | 0.33 | 0.31 | 0.26  | 0.10  | 0.06  | 0.22  | 1.52 | 31.08 | 26.22 |
| N-170 | 2.68 | 1.49  | 5.66 | 0.058 | 0.37 | 0.57 | 0.39 | 0.38  | 0.18  | 0.10  | 0.35  | 2.16 | 29.56 | 17.21 |
| N-171 | 1.97 | 1.08  | 4.44 | 0.026 | 0.35 | 0.40 | 0.36 | 0.35  | 0.19  | ND    | ND    | 1.59 | 34.44 | 14.25 |
| N-172 | 1.83 | 1.14  | 4.15 | 0.031 | 0.37 | 0.38 | 0.36 | 0.29  | 0.16  | 0.05  | 0.19  | 1.13 | 23.41 | 9.69  |
| N-173 | 1.58 | 1.00  | 4.57 | 0.083 | 0.39 | 0.42 | 0.31 | 0.29  | 0.15  | 0.06  | 0.40  | 2.83 | 32.19 | 21.38 |
| N-174 | 1.36 | 0.56  | 2.98 | 0.033 | 0.31 | 0.26 | 0.33 | 0.40  | 0.21  | 0.13  | 0.20  | 0.95 | 25.73 | 18.73 |
| N-175 | 2.03 | 1.34  | 5.38 | 0.044 | 0.35 | 0.47 | 0.37 | 0.34  | 0.15  | 0.07  | 0.30  | 2.23 | 31.84 | 21.00 |

Abbreviations: C0, free carnitine; ND, no data; UD, undetectable
